# Supplementary material for: Impact of the COVID-19 Pandemic on Healthcare Activity in the Regional Hospitals of Andalusia (Spain)
Source: MDPI journal article supplement (doi:10.3390/jcm11020363), 2022-01-12
Supplement: s1 [file s1]

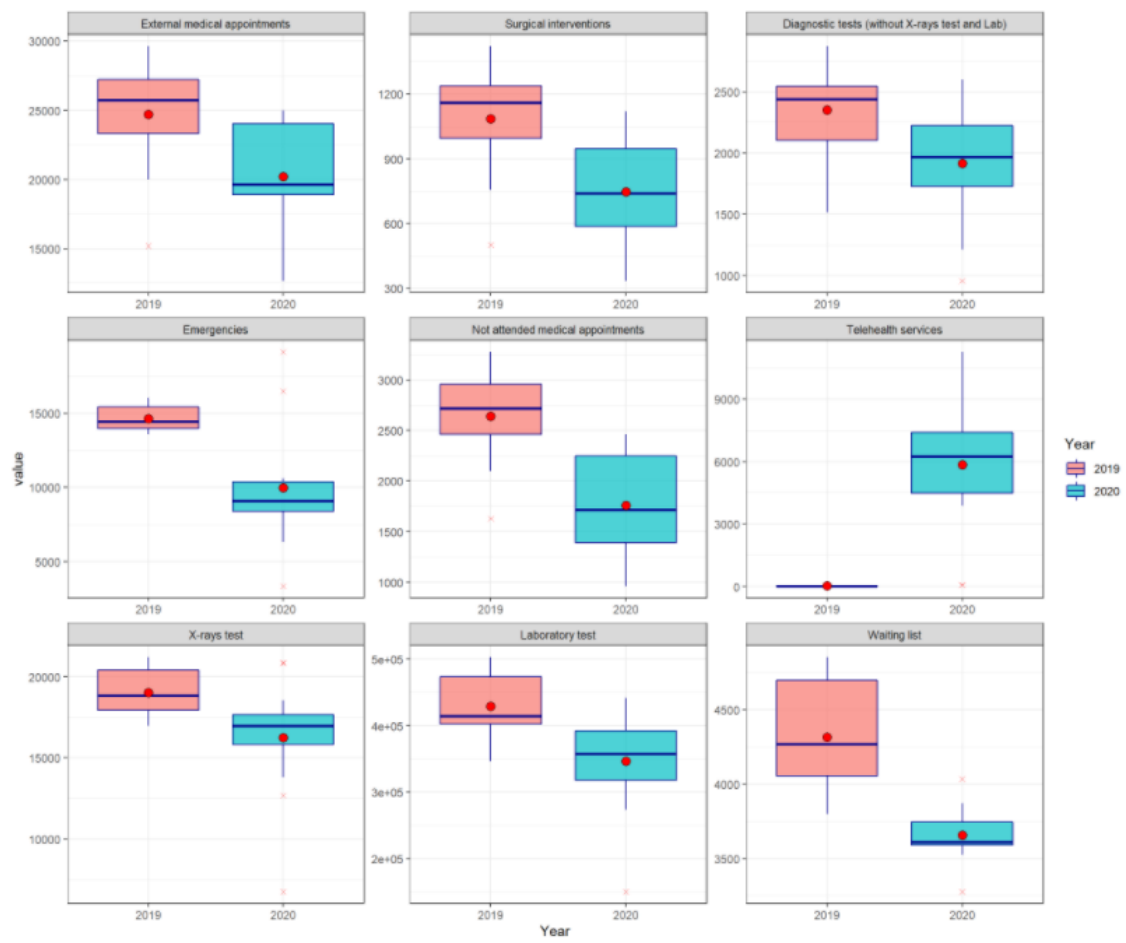

**Figure S1.** Box diagrams of the variables of interest in the Hospital de Poniente.

\* The red point represents the mean value and the blue line the median.

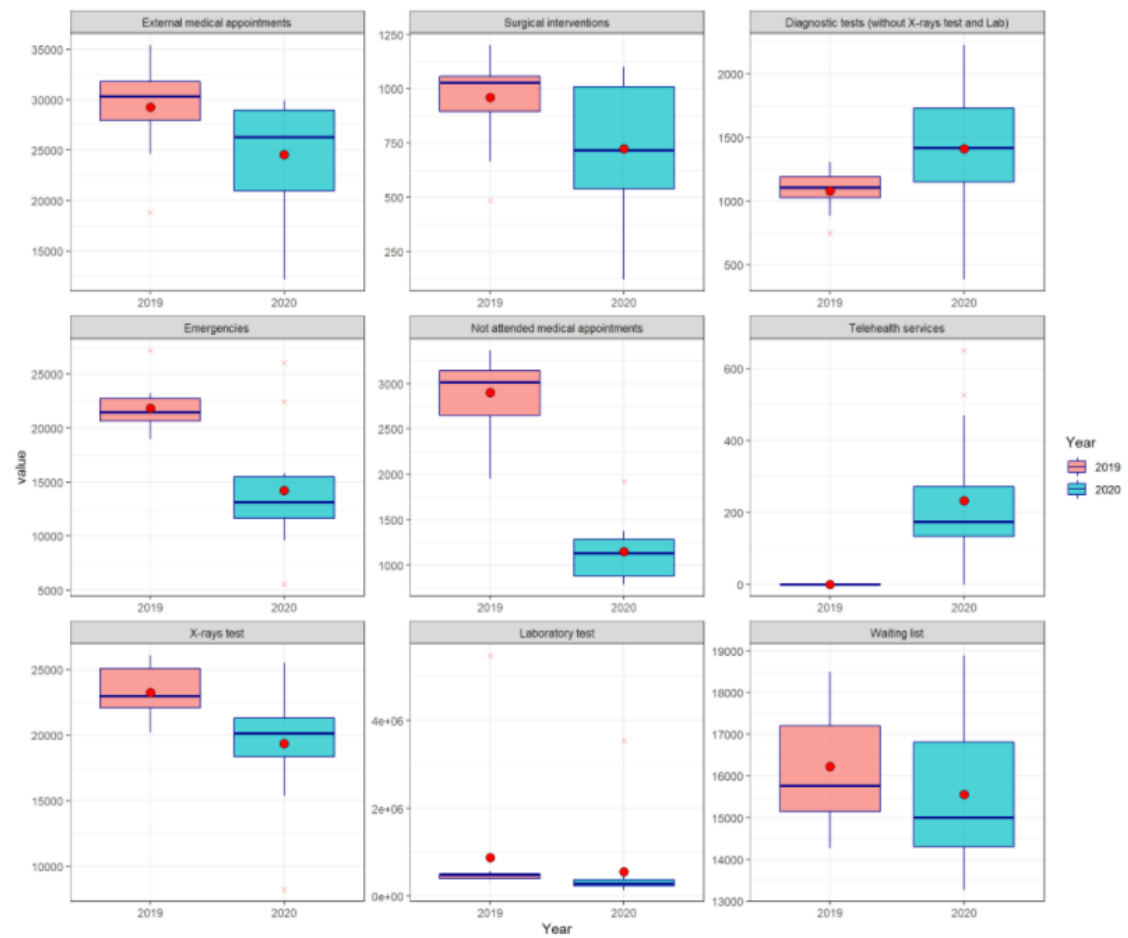

**Figure S2.** Box diagrams of the variables of interest in the Alto Guadalquivir Health Agency.

\* The red point represents the mean value and the blue line the median.

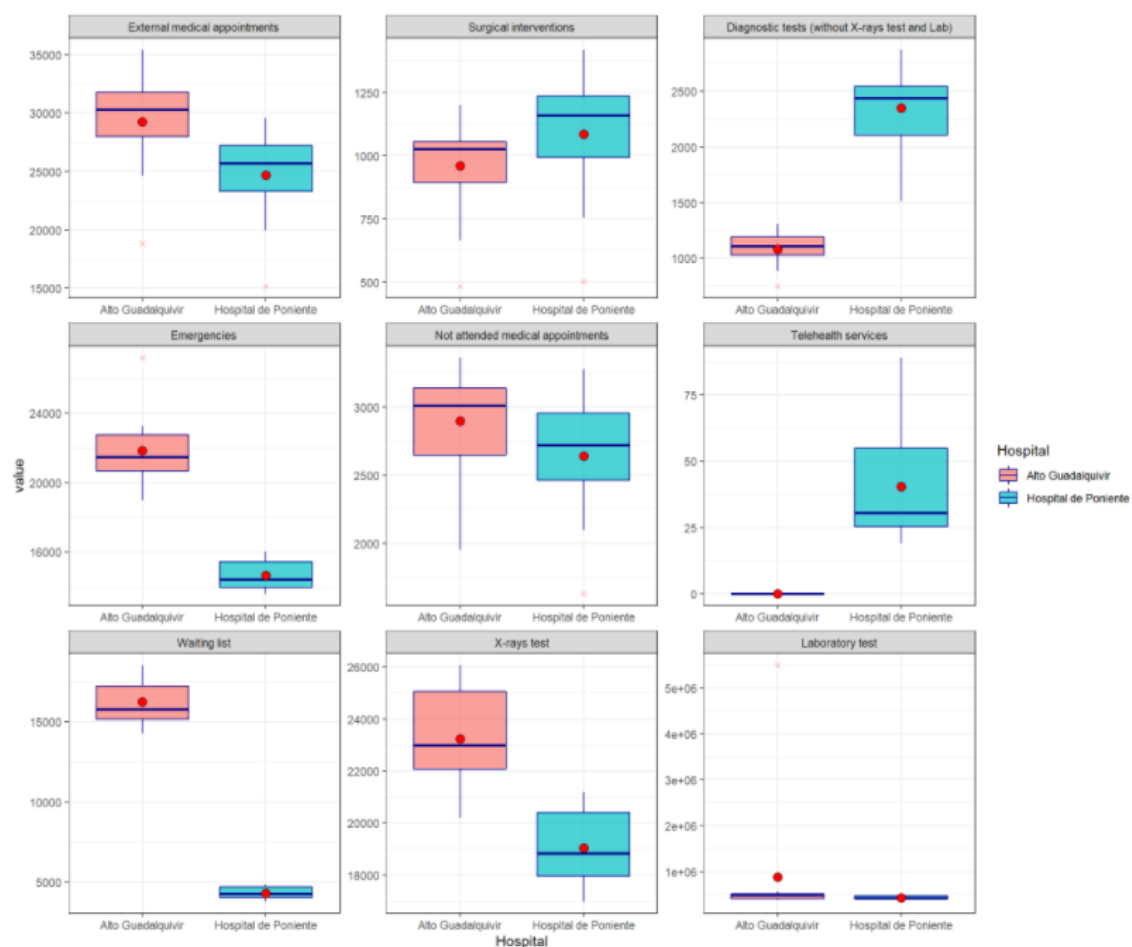

**Figure S3.** Box diagrams of the variables of interest, comparison between both hospitals (year 2019).

\* The red point represents the mean value and the blue line the median.

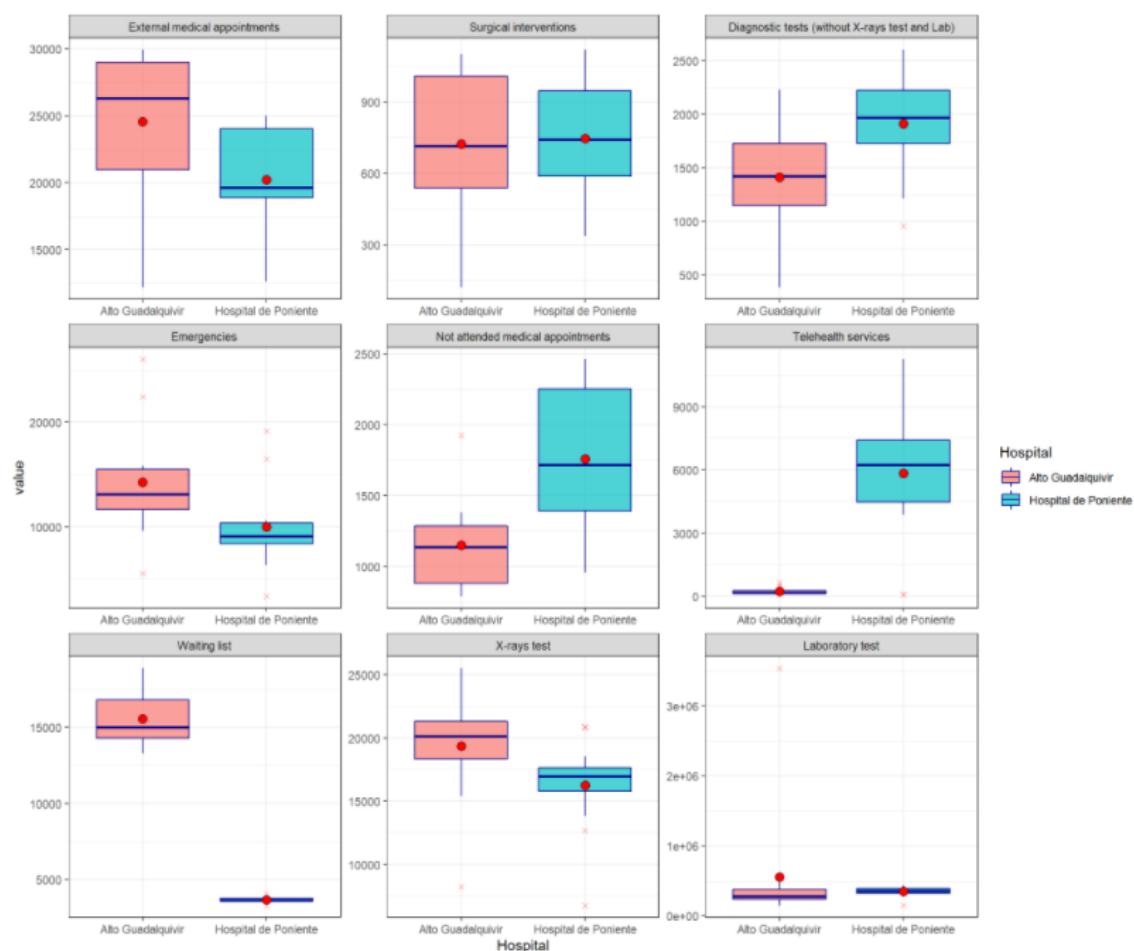

**Figure S4.** Box diagrams of the variables of interest, comparison between both hospitals (year 2020).  
 \* The red point represents the mean value and the blue line the median.
